# Supplementary material
Source: publisher figshare collection journal article supplement (https://acs.figshare.com/ndownloader/files/4710898)
Supplement: Supplementary file 1 [file 4710898]

# Unprecedented (3,9)-Connected $(4^2.6)_3(4^6.6^{21}.8^9)$ Net Constructed by Trinuclear Mixed-Valence Cobalt Clusters

Xian-Ming Zhang, Yan-Zhen Zheng, Cui-Rui Li, Wei-Xiong Zhang, Xiao-Ming Chen  
School of Chemistry & Material Science Shanxi Normal University Linfen 041004, P. R. China. & MOE Key Laboratory of Bioinorganic and Synthetic Chemistry, School of Chemistry and Chemical Engineering, Sun Yat-Sen University, Guangzhou 510275, P. R. China.

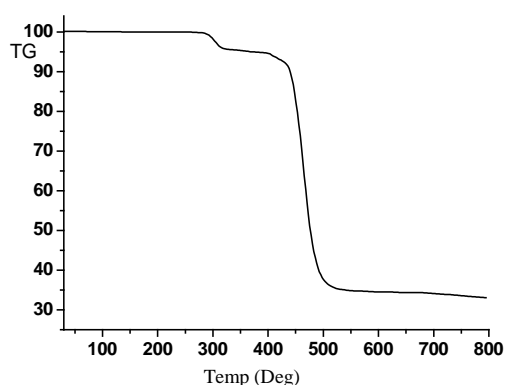

**Figure S1.** TGA curve of **1** in air at the heating rate of 15°C per min.

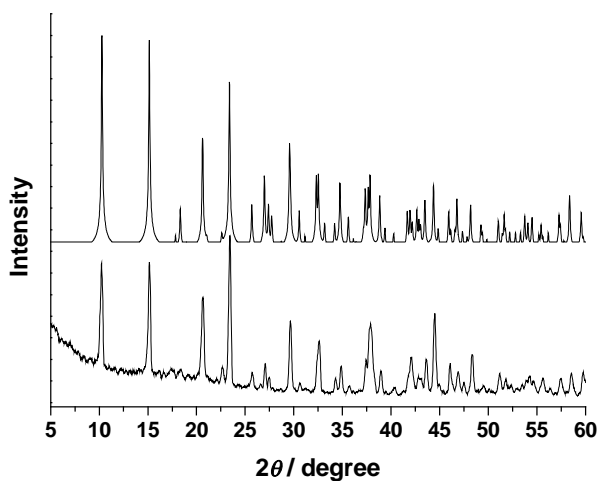

**Figure S2.** The simulated (top) and measured (bottom) of XRPD patterns of **1**.

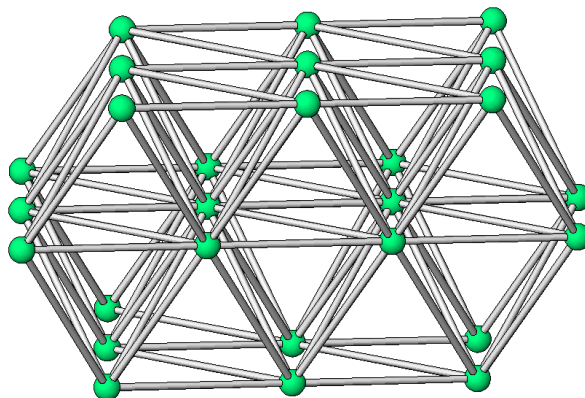

**Figure S3.** Schematic view of the 12-connected uninodal SQC15 net in **1**. The green balls represent  $\text{Co}_3(\text{OH})(\text{CO}_2)_6$  clusters.

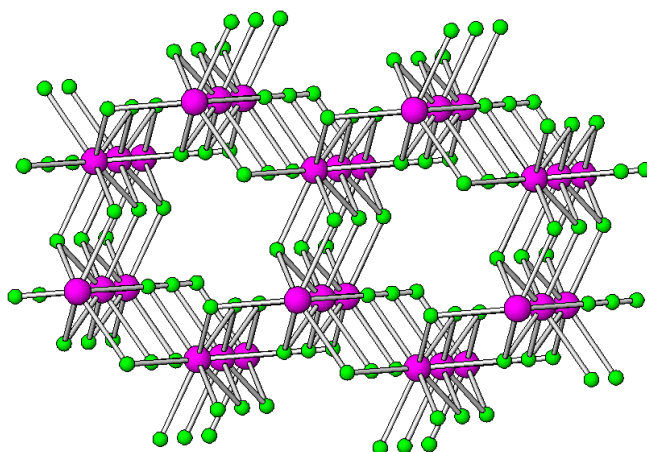

**Figure S4.** Schematic view of the 3-D (3,9)-connected net of  $\text{LaCl}_3$ .

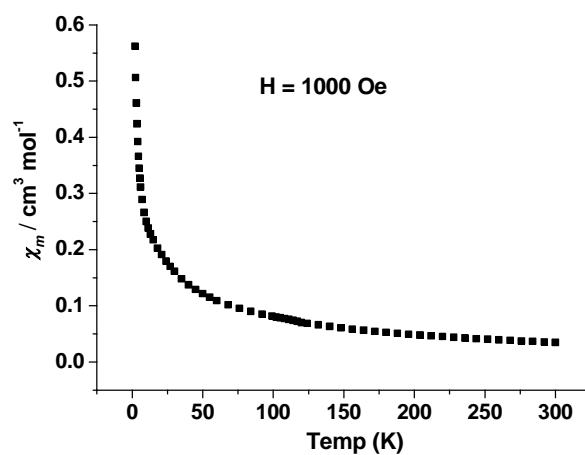

**Figure S5.** The temperature dependence of susceptibilities measured under an applied field of 1000 Oe.
